# Supplementary material for: HLA-DQA1*05 and upstream variants of PPARGC1B are associated with infliximab persistence in Japanese Crohn’s disease patients
Source: Research Square preprint supplement (doi:10.21203/rs.3.rs-2760827/v1), 2023-04-06
Supplement: Supplementary file 1 [file 47cd5e2433636c985bdcc9fa.docx]

Supplementary Table 1: Characteristics of patients classified according to the HLA-DQA1*05 (rs2097432) genotype.

| **Variables** | **DQA1*05_carrier** | **DQA1*05_noncarrier** | **P-value** |
| --- | --- | --- | --- |
| Sex (Female, %) | 8 (21.6) | 46 (30.3) | 0.417 |
| Age at diagnosis (years; Median (interquartile range)) | 21 (17-27) | 21 (18-26) | 0.6 |
| ＜21 years (%) | 18 (48.6) | 66 (43.4) | 0.585 |
| BMI at the start of the biologics (Median (interquartile range)) | 19.4 (17.8-21.5) | 19.6 (18.1-21.8) |  |
| <19 (%) | 18 (48.6) | 70 (46.1) | 1 |
| Disease duration at the start of IFX therapy (years; Median (interquartile range)) | 9.5 (1.4-15.2) | 7.3 (2.7-13.2) |  |
| ＜9 years (%) | 17 (45.9) | 69 (45.4) | 0.626 |
| Disease location ileal (%) | 4 (10.8) | 22 (14.5) | 0.084 |
| colonic (%) | 1 (2.7) | 23 (15.1) |  |
| ileocolonic (%) | 32 (86.5) | 107 (70.4) |  |
| Disease behavior inflammation (%) | 14 (37.8) | 49 (32.2) | 0.702 |
| stenosis (%) | 17 (45.9) | 70 (46.1) |  |
| fistula (%) | 6 (16.2) | 33 (21.7) |  |
| Perianal disease (Yes, %) | 28 (75.7) | 110 (72.4) | 0.837 |
| Previous intestinal resection (Yes, %) | 23 (62.2) | 98 (64.5) | 0.849 |
| Smoking at the start of IFX therapy (Yes, %) | 6 (16.2) | 35 (23) | 0.366 |
| Concomitant elemental diet (Yes, %) | 15 (40.5) | 50 (32.9) | 0.441 |
| Concomitant thiopurine (Yes, %) | 8 (21.6) | 23 (15.1) | 0.331 |
| Serum albumin levels at the baseline (g/dl; Median (interquartile range)) | 3.5 (3.4-4.1) | 3.7 (3.3-4) | 0.972 |
| CRP levels at the baseline (mg/dl; Median (interquartile range)) | 0.5 (0.2-3) | 0.6 (0.2-1.8) | 0.239 |

Abbreviations: DQA1*05_carrier; patients with rs2097432 genotype of CC or CT, DQA1*05_noncarrier; patients with rs2097432 genotype of TT, BMI, body mass index; CRP, C-reactive protein
