# Supplementary material for: HLA-DQA1*05 and upstream variants of PPARGC1B are associated with infliximab persistence in Japanese Crohn’s disease patients
Source: Research Square preprint supplement (doi:10.21203/rs.3.rs-2760827/v1), 2023-04-06
Supplement: Supplementary file 2 [file 5416235137605d4f6ed68e7d.docx]

Supplementary Table 2: Results of pathway level analysis (P-value < 0.01)

| **Dataset** | **Pathways** | **Number of Genes** | **P-value** |
| --- | --- | --- | --- |
| REACTOME | SIGNALING_BY_PDGF | 56 | 8.56E-05 |
| REACTOME | FCGR_ACTIVATION | 12 | 5.81E-04 |
| REACTOME | PECAM1_INTERACTIONS | 12 | 7.65E-04 |
| REACTOME | CD28_CO_STIMULATION | 32 | 8.02E-04 |
| REACTOME | ATF6_ATF6_ALPHA_ACTIVATES_CHAPERONES | 11 | 1.07E-03 |
| REACTOME | FOXO_MEDIATED_TRANSCRIPTION_OF_CELL_DEATH_GENES | 15 | 1.15E-03 |
| REACTOME | ANTI_INFLAMMATORY_RESPONSE_FAVOURING_LEISHMANIA_PARASITE_INFECTION | 162 | 2.17E-03 |
| KEGG | STEROID_HORMONE_BIOSYNTHESIS | 53 | 3.35E-03 |
| KEGG | EPITHELIAL_CELL_SIGNALING_IN_HELICOBACTER_PYLORI_INFECTION | 66 | 3.40E-03 |
| KEGG | METABOLISM_OF_XENOBIOTICS_BY_CYTOCHROME_P450 | 68 | 4.80E-03 |
| REACTOME | ADORA2B_MEDIATED_ANTI_INFLAMMATORY_CYTOKINES_PRODUCTION | 130 | 4.80E-03 |
| REACTOME | SIGNALING_BY_KIT_IN_DISEASE | 19 | 5.56E-03 |
| REACTOME | CELL_SURFACE_INTERACTIONS_AT_THE_VASCULAR_WALL | 130 | 5.92E-03 |
| REACTOME | EXTRA_NUCLEAR_ESTROGEN_SIGNALING | 73 | 6.19E-03 |
| REACTOME | DEGRADATION_OF_THE_EXTRACELLULAR_MATRIX | 133 | 7.05E-03 |
| KEGG | DRUG_METABOLISM_OTHER_ENZYMES | 49 | 7.38E-03 |
| REACTOME | EPHB_MEDIATED_FORWARD_SIGNALING | 40 | 7.51E-03 |
| REACTOME | ECM_PROTEOGLYCANS | 73 | 8.82E-03 |
